# Supplementary material
Source: Royal Society of Chemistry journal article supplement (doi:10.1039/d6ta00227g)
Supplement: d6ta00227g1.pdf [file d6ta00227g1.pdf]

## Supplementary information

### **Tensile-strained silver assembly enables ampere-level electrochemical CO<sub>2</sub>-to-CO conversion across a wide pH range**

Weibo Hu,<sup>\*a</sup> Lihua Zhu,<sup>b</sup> Chuyi Zhao,<sup>b</sup> Shuran Yao,<sup>b</sup> Junsong Song,<sup>a</sup> Jiale Chen,<sup>a</sup>  
Xiaopeng Li<sup>\*b</sup> and Jianming Li<sup>\*a</sup>

<sup>a</sup>School of New Energy, Ningbo University of Technology, Ningbo 315336, China

E-mail: [huwb@nbut.edu.cn](mailto:huwb@nbut.edu.cn); [jmli@nbut.edu.cn](mailto:jmli@nbut.edu.cn)

<sup>b</sup>State Key Laboratory of Advanced Fiber Materials, College of Materials Science and  
Engineering, Donghua University, Shanghai 201620, China

E-mail: [xiaopeng.li@dhu.edu.cn](mailto:xiaopeng.li@dhu.edu.cn)

## 1. Density functional theory (DFT) calculations

DFT calculations employed the Vienna Ab initio Simulation Package (VASP) with the generalized gradient approximation and Perdew-Burke-Ernzerhof (GGA-PBE) functional and PAW pseudopotentials. A 450 eV plane-wave cutoff and DFT-D3 van der Waals correction were applied. Geometries were optimized until forces  $< 0.05$  eV/Å. A  $2 \times 2 \times 1$   $k$ -mesh sampled the 4-layer Ag(111) slab, with 2% tensile strain applied to simulate grain boundary stress. Bottom-layer atoms were fixed, and edge atoms were constrained to maintain stress.

Reaction step free energies ( $\Delta G$ ) for CO<sub>2</sub>RR and HER were calculated using the CHE model. Potential-dependent  $\Delta G$  was calculated as  $\Delta G(U) = \Delta G(0V) - neU$ . Gibbs free energy followed:  $\Delta G = \Delta E + \Delta E_{ZPE} - T\Delta S$ , where  $\Delta E$ ,  $\Delta E_{ZPE}$ , and  $\Delta S$  denote DFT energy, zero-point energy, and entropy changes at 298.15 K, respectively.

## 2. Electrochemical Measurements

The long-term stability test was conducted in 0.3 M K<sub>2</sub>SO<sub>4</sub> (pH  $\approx$  3) to alleviate the salting-out effect. The lower electrolyte concentration yields a higher solution resistance, leading to obvious potential deviation under the same  $0.8 \times iR_s$  compensation ratio compared with the performance tests performed in 0.5 M K<sub>2</sub>SO<sub>4</sub>.

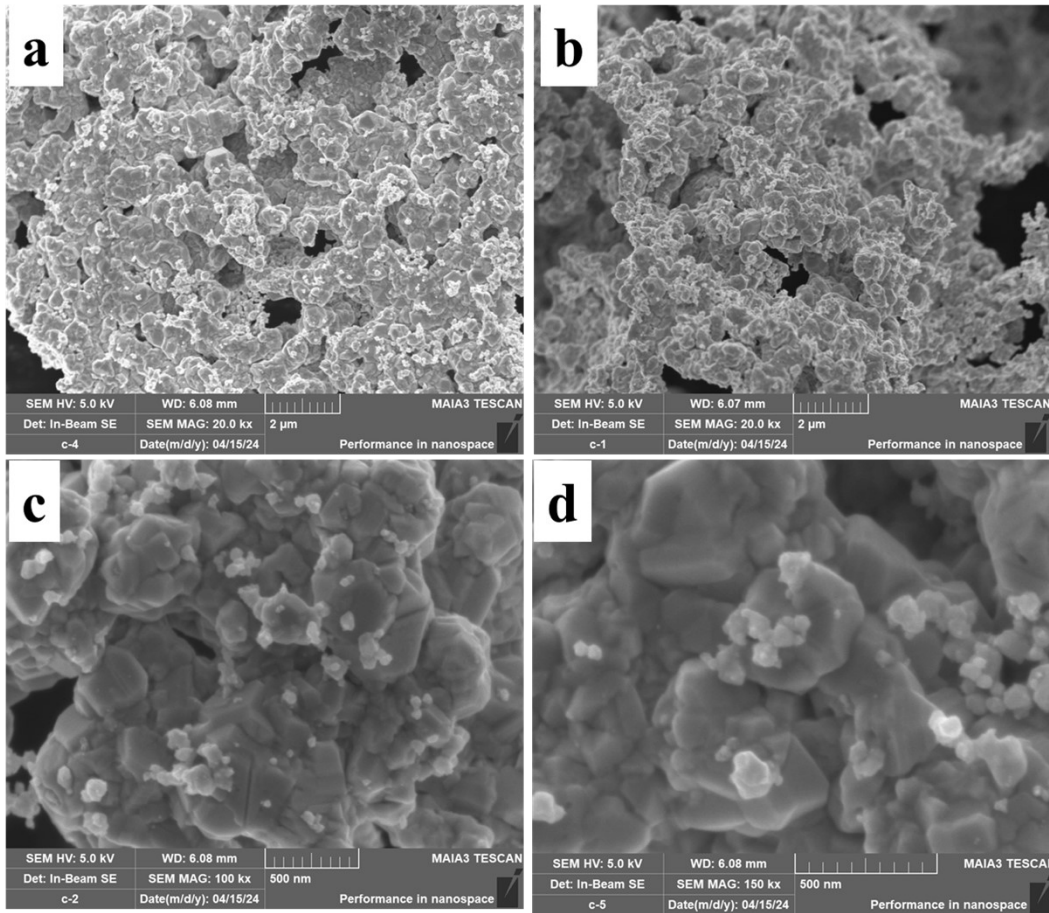

**Fig. S1** SEM images of the silver sample prepared using D-glucose as the reducing agent

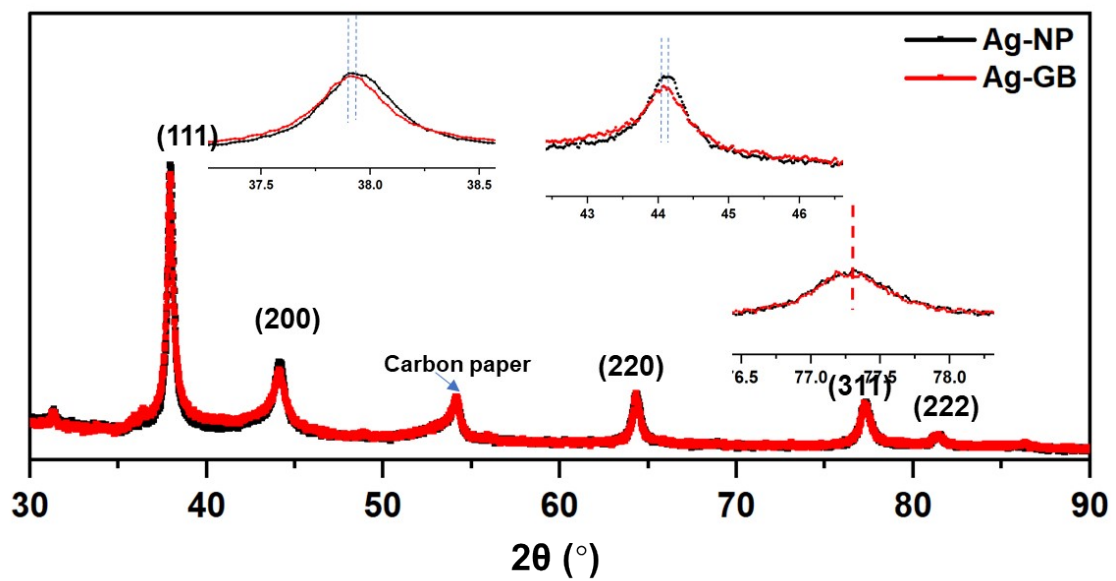

**Fig. S2** XRD patterns of Ag-GB and Ag-NP.

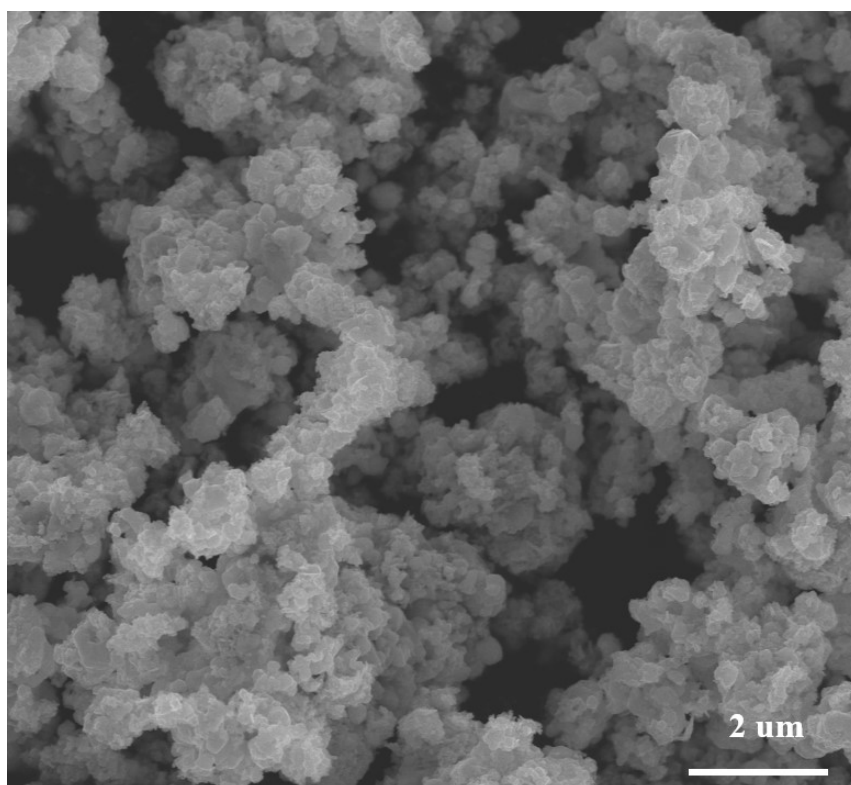

**Fig. S3** SEM image of Ag-NP

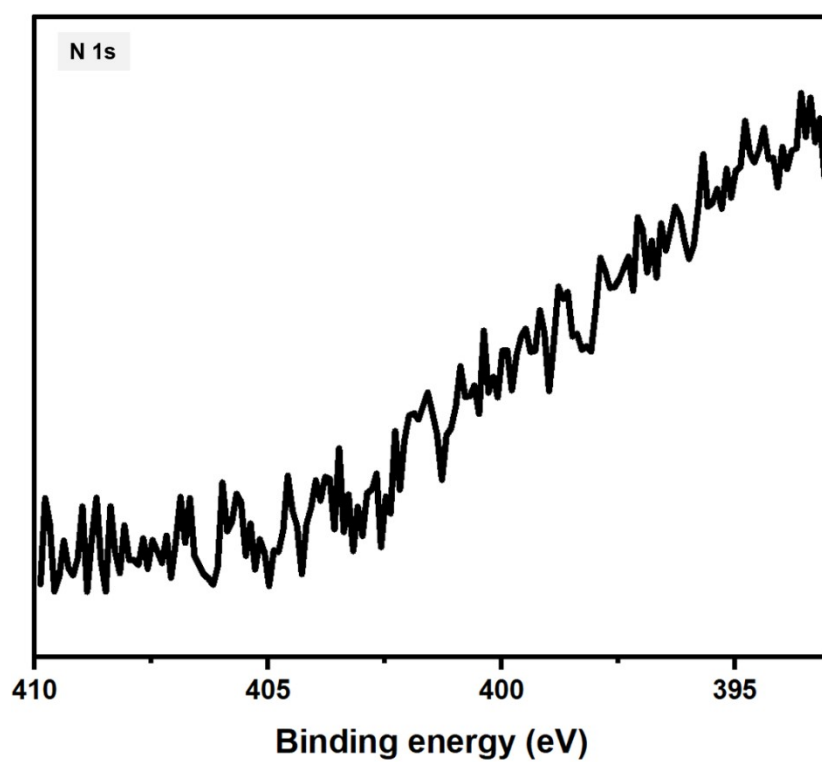

**Fig. S4** the N 1s XPS spectrum of Ag-GB

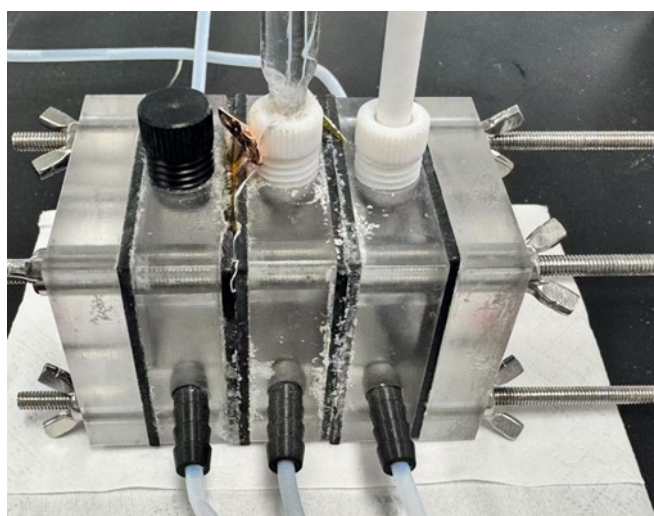

**Fig. S5** The image of the customized flow cell

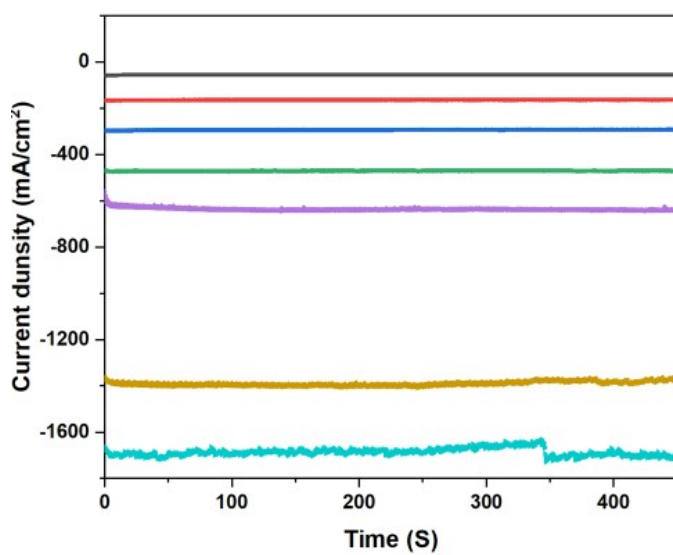

**Fig. S6** The representative i-t curves on Ag-GB

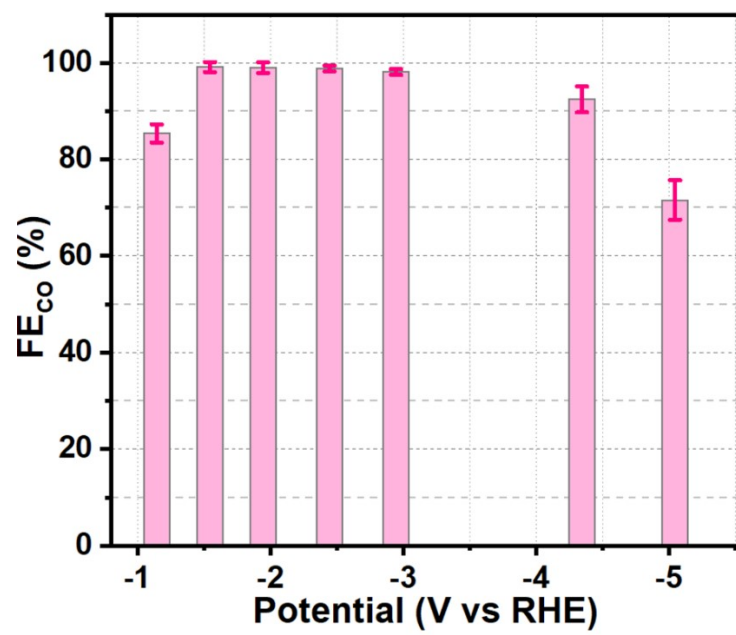

**Fig. S7** Potential-dependent FE<sub>CO</sub> on Ag-GB (without iR correction)

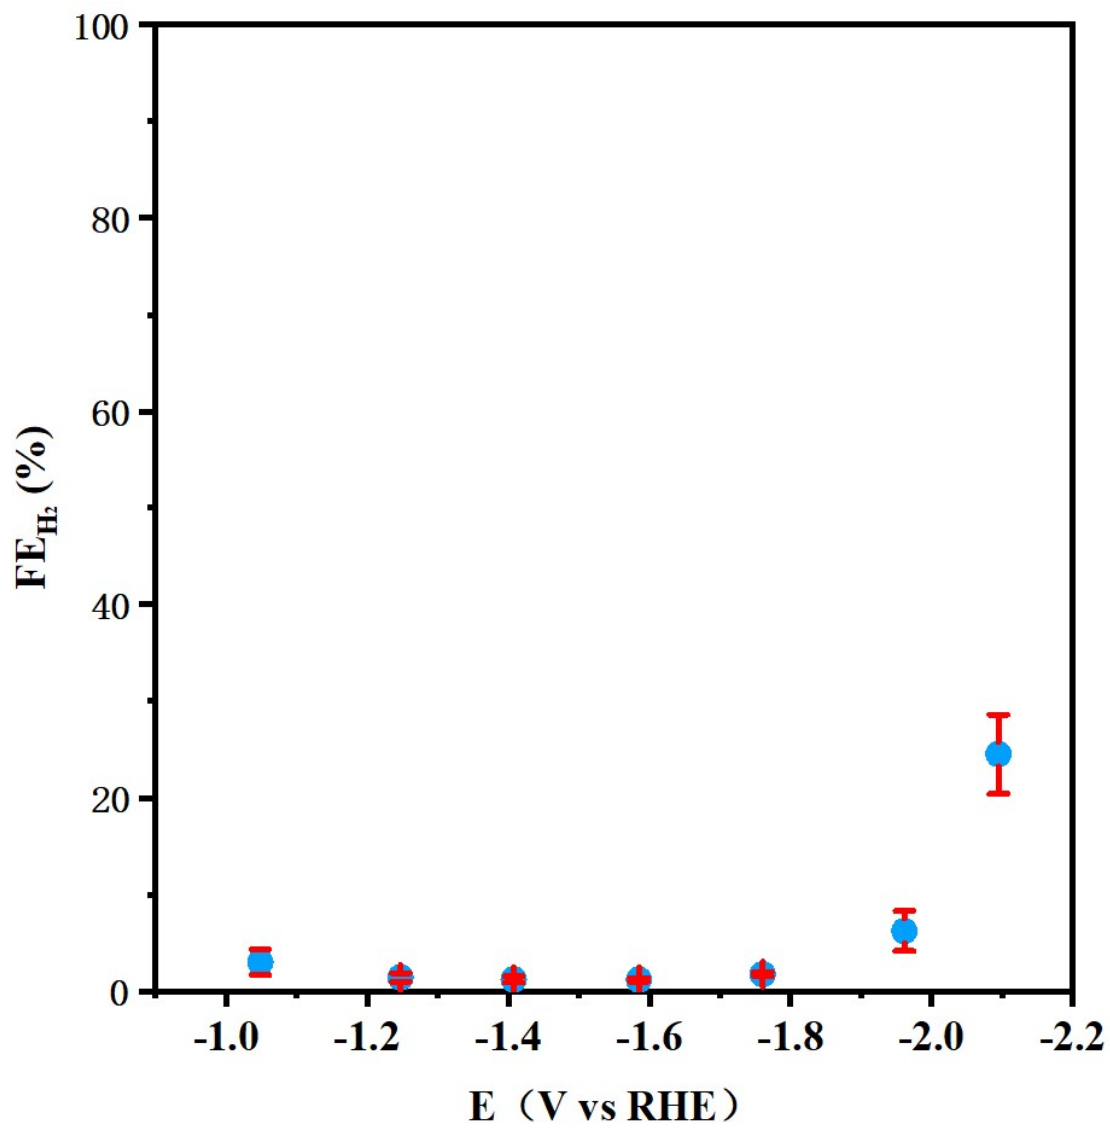

Fig. S8 Potential-dependent FE for H<sub>2</sub> on Ag-GB

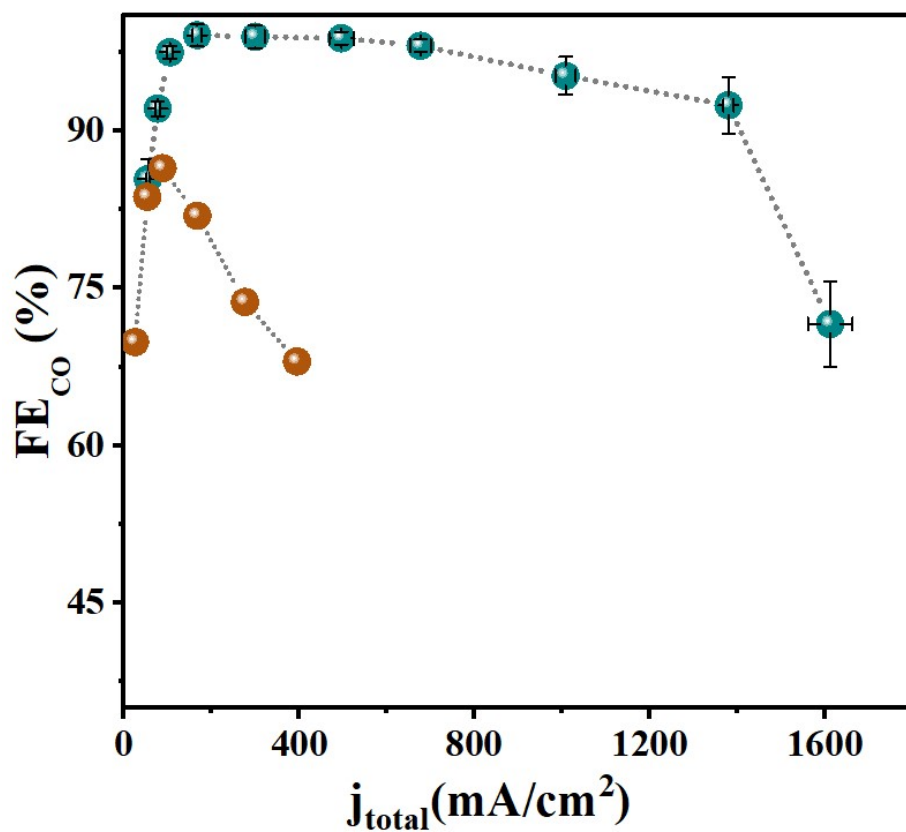

Fig. S9 Current density-dependent FE for CO on Ag-GB

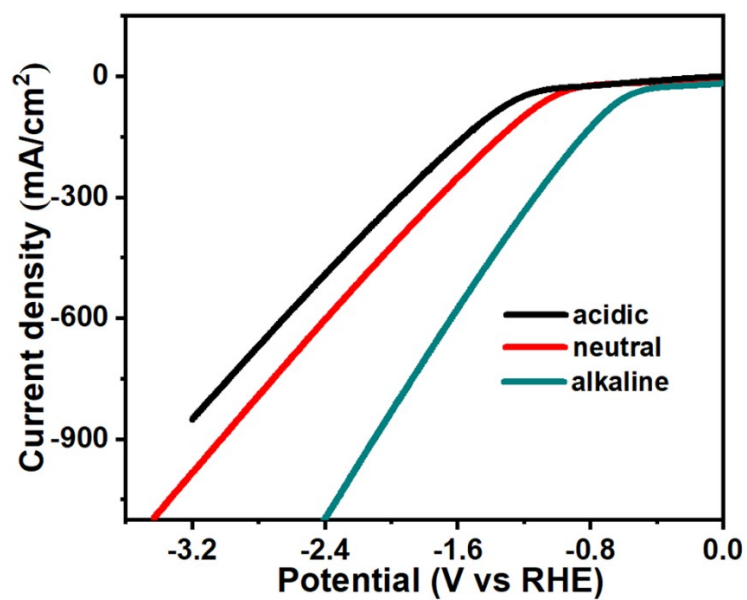

Fig. S10 LSV curves of Ag-GB under CO<sub>2</sub> atmosphere (without iR correction)

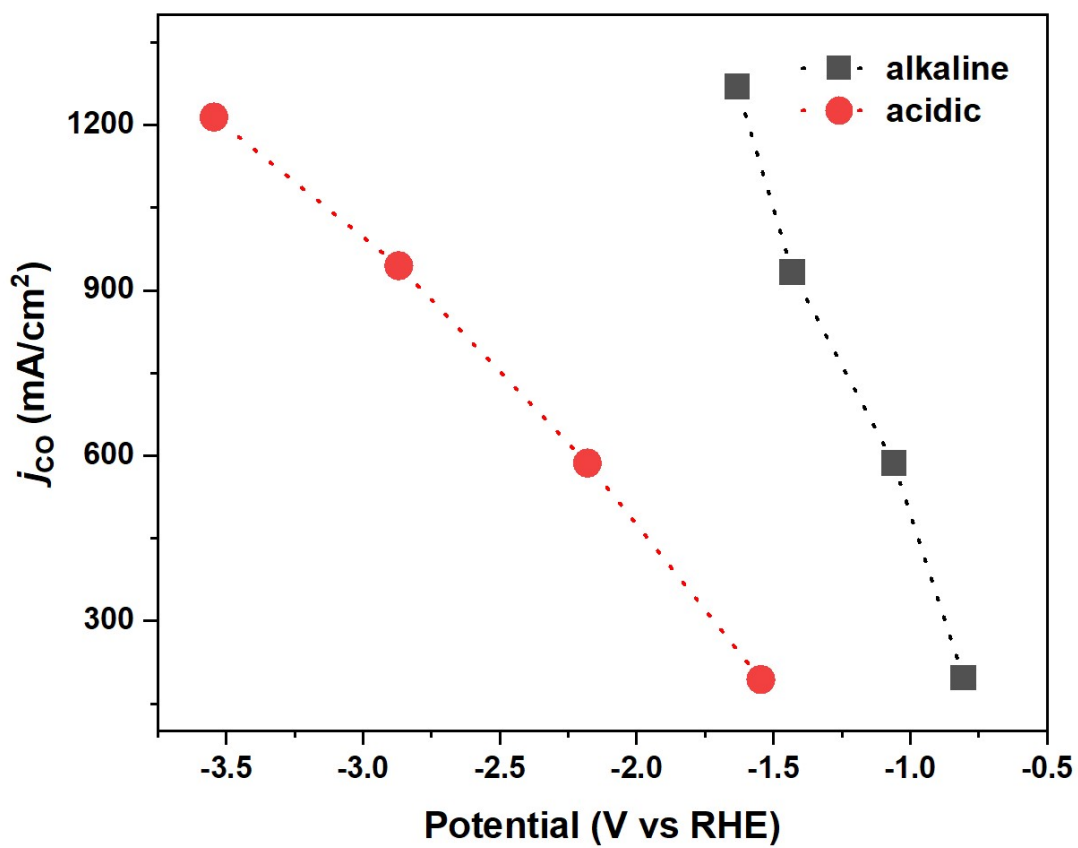

Fig. S11 Potential-dependent  $j_{CO}$  on Ag-GB

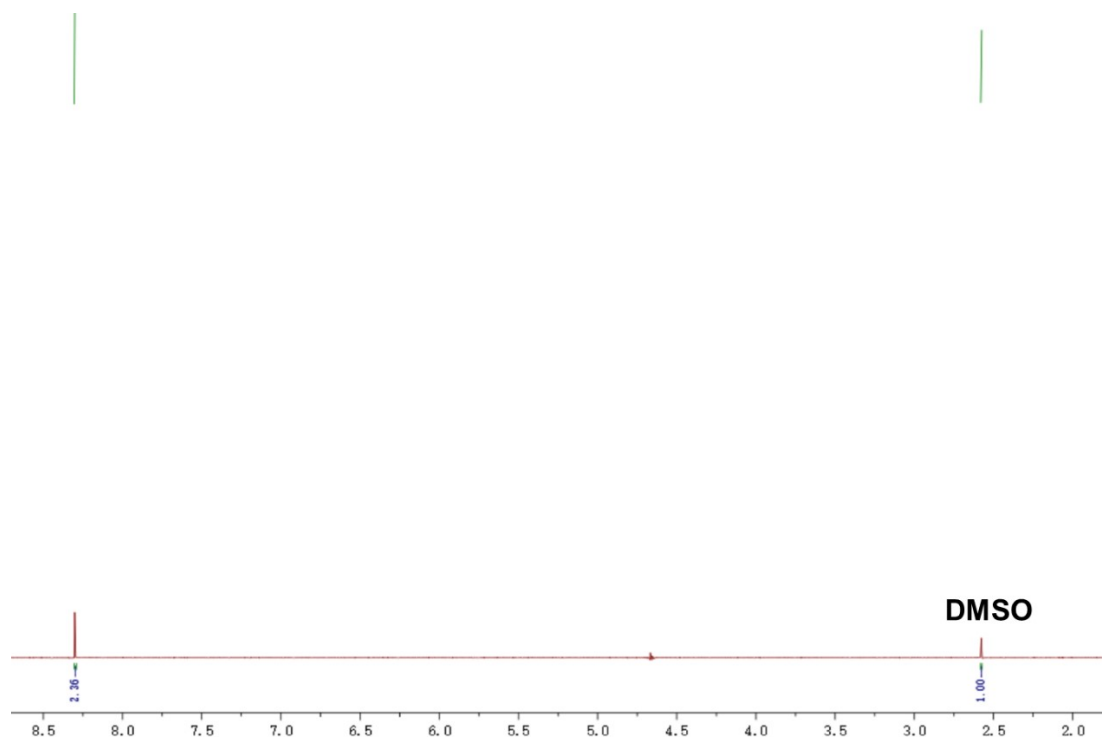

Fig. S12 <sup>1</sup>H-NMR of the electrolyte after the stability test. Note: The spectrum was

acquired with water peak suppression.

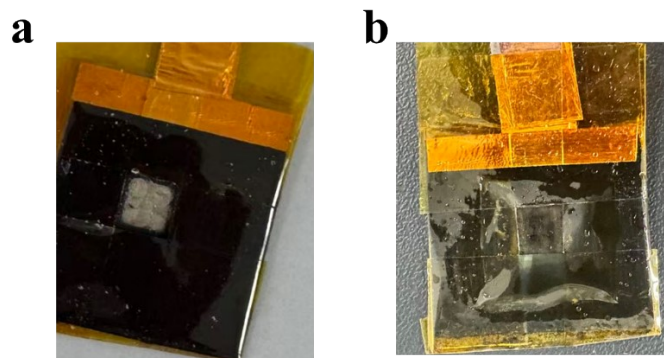

**Fig. S13** Photographs of the electrodes after (a) 30 min and (b) 100 h of electrocatalysis.

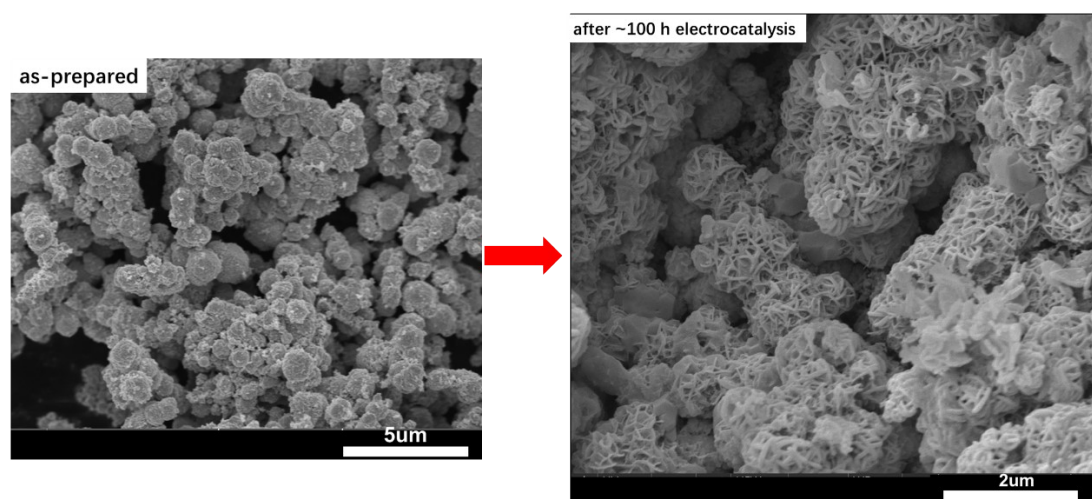

**Fig. S14** SEM images of Ag-GB before and after stability test.

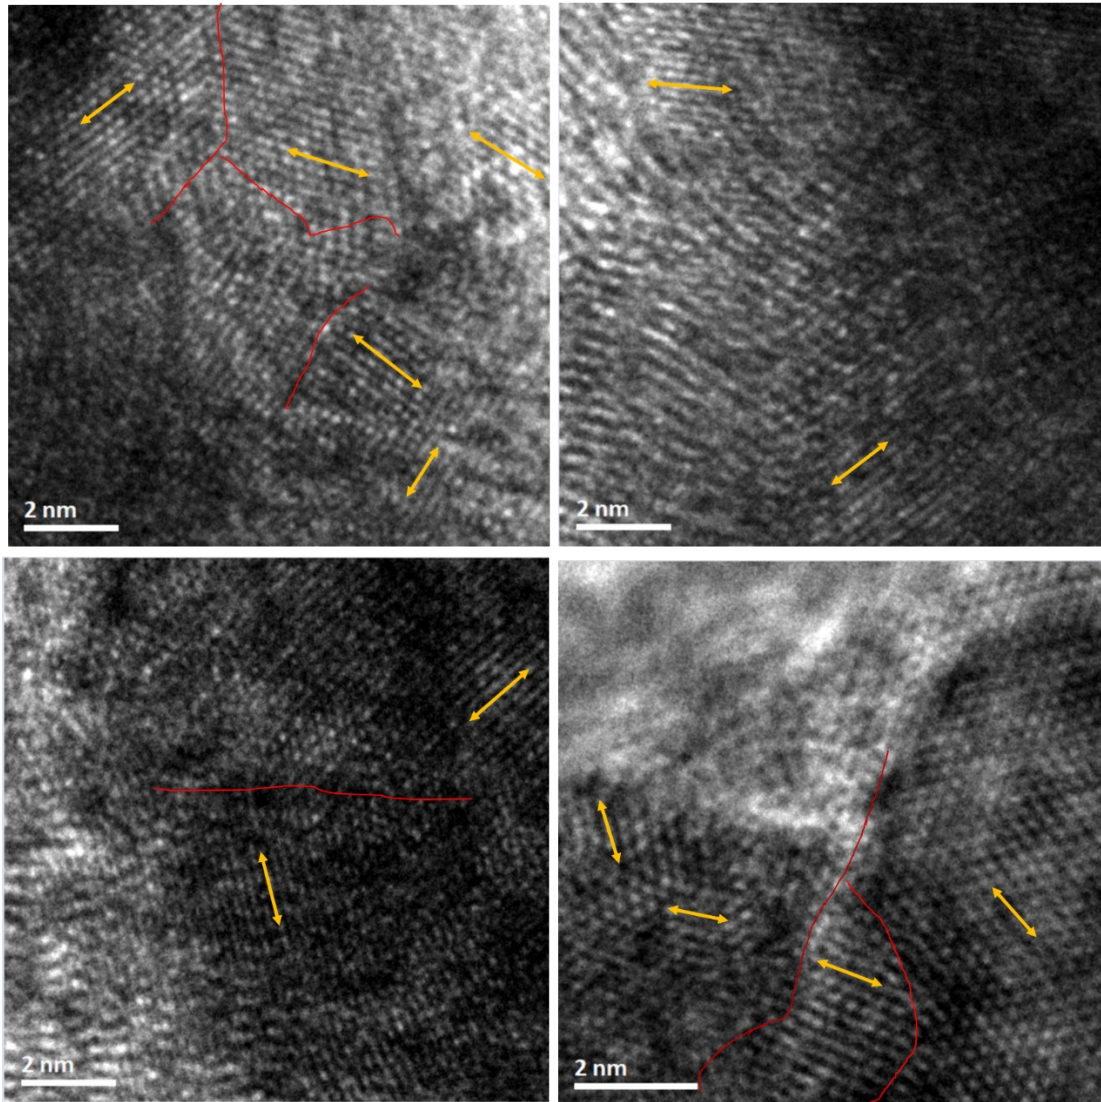

**Fig. S15** HR-TEM images of Ag-GB after the stability test.

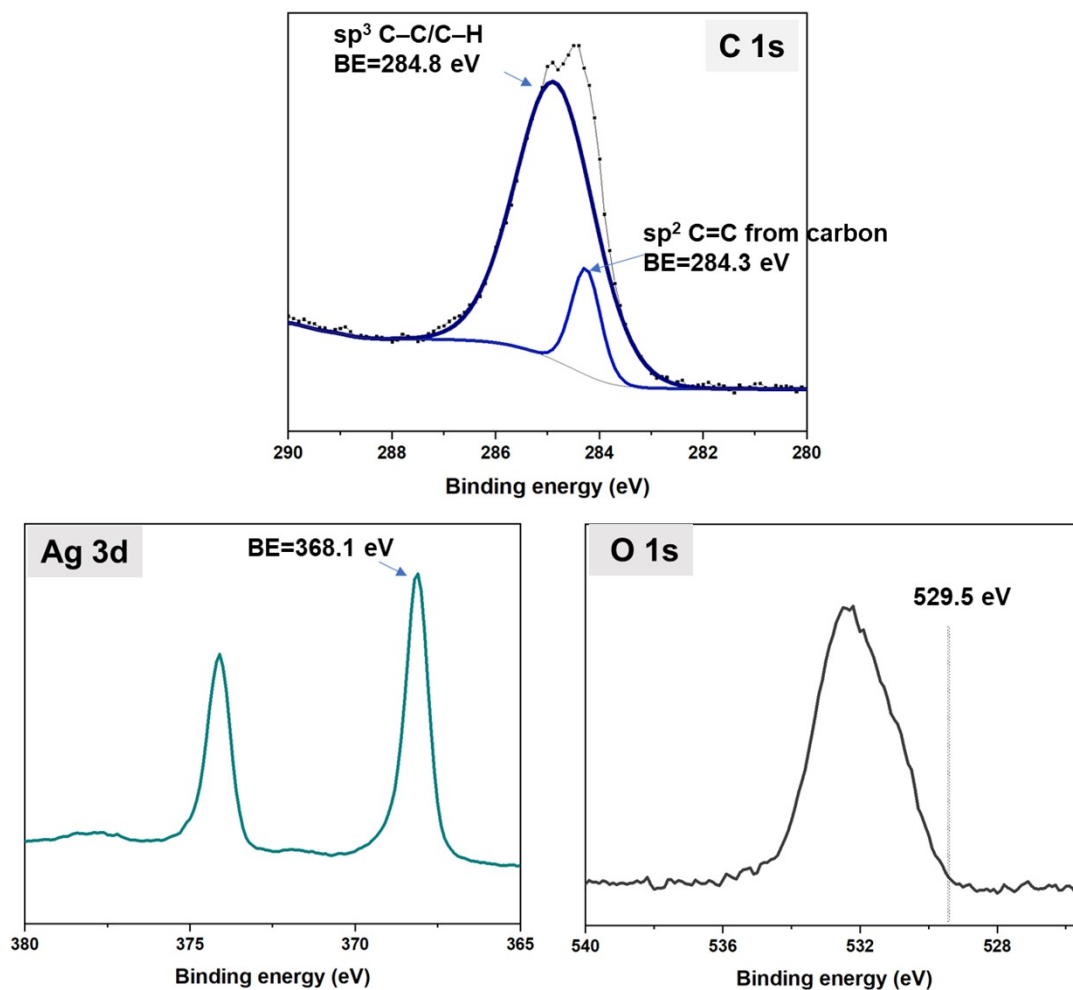

**Fig. S16** XPS spectra of Ag-GB after the stability test. Prior to the analysis, the sample was cleaned by Ar<sup>+</sup> ion sputtering to exclude the possible influence of surface oxidation.

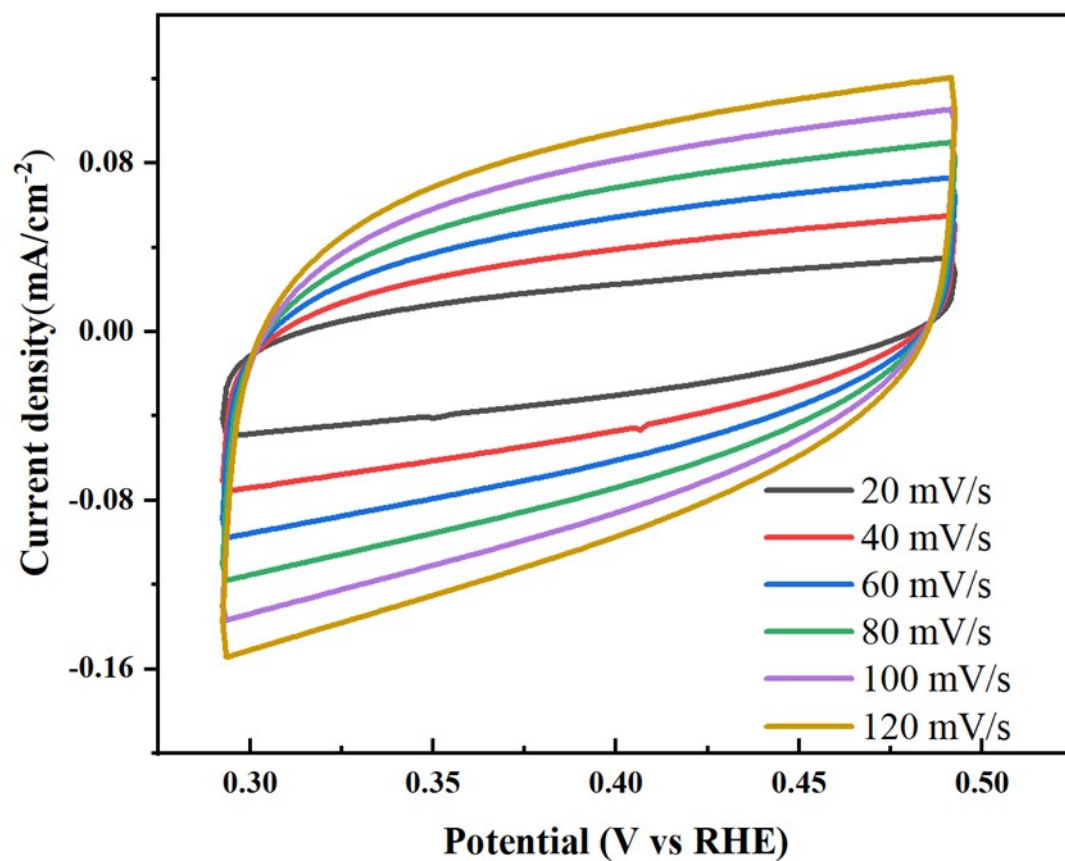

**Fig. S17** CV curves of Ag-NP recorded at various scan rates.

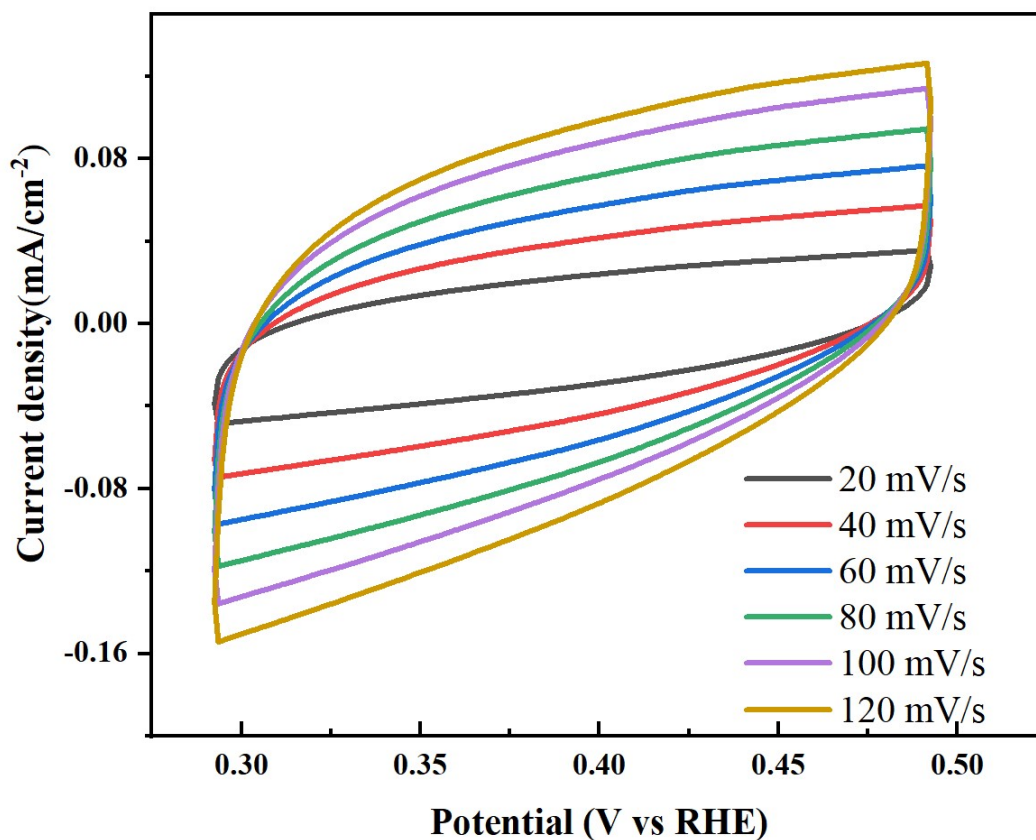

Fig. S18 CV curves of Ag-GB recorded at various scan rates.

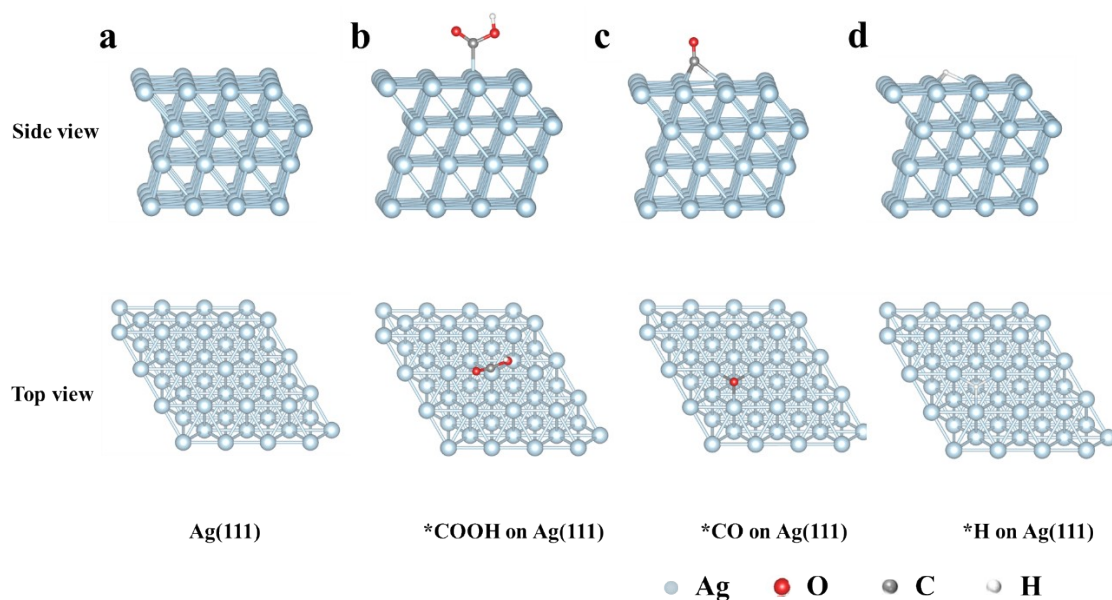

Fig. S19 (a) Representative surface atom configurations of Ag (111). Optimized surface slabs with adsorbed (b) \*COOH, (c) \*CO and (d) \*H on Ag (111) surfaces. The light blue, red, gray and white balls represent Ag, O, C and H, respectively.

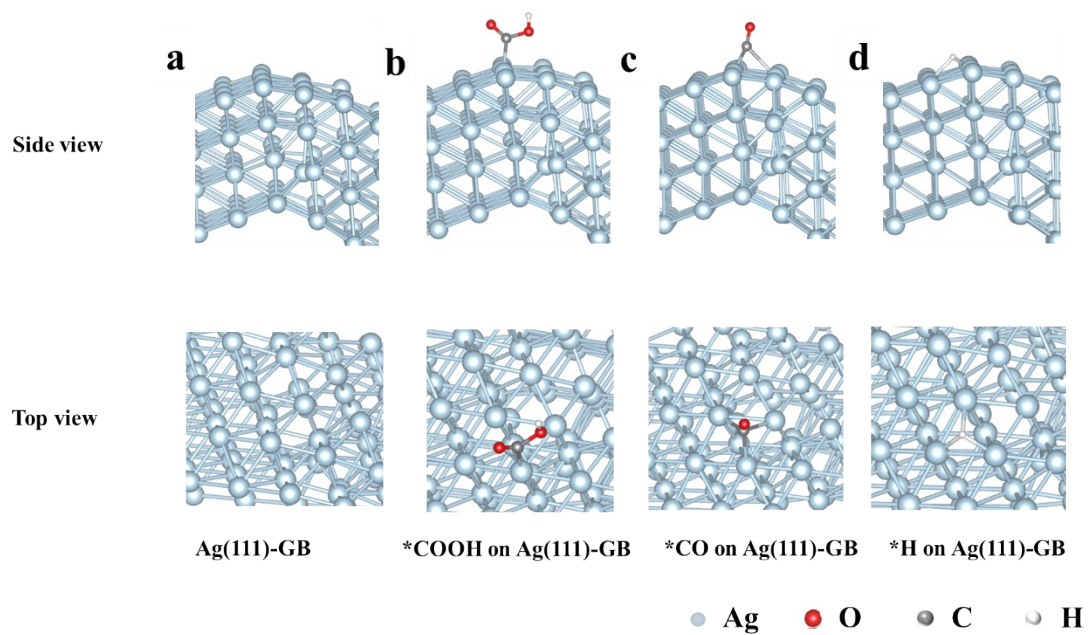

**Fig. S20** (a) Representative surface atom configurations of strained Ag (111). Optimized surface slabs with adsorbed (b) \*COOH, (c) \*CO and (d) \*H on Ag (111)-GB surfaces. The light blue, red, gray and white balls represent Ag, O, C and H, respectively.

**Table S1.** Comparison of recent reported CO<sub>2</sub>RR catalysts

| Catalyst                                                   | Electrolyte                          | Cell type | Catalyst loading (mg/cm <sup>2</sup> ) | Potential (V vs RHE) | iR correction (%) | <i>j</i> <sub>CO</sub> (mA/cm <sup>2</sup> ) | FE (%) | Ref.      |
|------------------------------------------------------------|--------------------------------------|-----------|----------------------------------------|----------------------|-------------------|----------------------------------------------|--------|-----------|
| re-AgS <sub>4</sub>                                        | 1 M KOH                              | flow cell | 2                                      | <-0.6                | N/A <sup>b</sup>  | 750                                          | 93     | 1         |
| AuAg <sub>24</sub>                                         | 0.1 M KHCO <sub>3</sub>              | MEA       | 1                                      | 3.6 <sup>a</sup>     | 0                 | 202.2                                        | 90.4   | 2         |
| Ni-N4/C-NH <sub>2</sub>                                    | 1 M KOH                              | flow cell | 3                                      | -1                   | 85                | 447                                          | 89     | 3         |
| Ni@CC-T                                                    | 1 M KOH                              | flow cell | 1                                      | -1.3                 | 85                | 399.2                                        | 99.8   | 4         |
| CeO <sub>2</sub> /AgNWs                                    | 1 M KOH                              | flow cell | 1.5                                    | -1.5                 | 85                | 251.3                                        | 92.1   | 5         |
| NiNC-PANI                                                  | 0.1 M KHCO <sub>3</sub>              | MEA       | 1                                      | ~3 <sup>a</sup>      | 0                 | 200                                          | 100    | 6         |
| plasma-treated Ag                                          | 0.01 M CsOH                          | MEA       | 0.27                                   | 3 <sup>a</sup>       | 0                 | ~350                                         | 92     | 7         |
| Ni-N-C-900                                                 | 1.0 M KOH                            | flow cell | 2                                      | -0.96                | N/A <sup>b</sup>  | 391                                          | 98     | 8         |
| Ni@NiNCM                                                   | 1.0 M KHCO <sub>3</sub>              | flow cell | 1                                      | N/A                  | N/A <sup>b</sup>  | 100                                          | >90    | 9         |
| FNC-SnOF                                                   | 1.0 M KHCO <sub>3</sub>              | flow cell | 1                                      | -0.7                 | N/A <sup>b</sup>  | 141                                          | 93.8   | 10        |
| NiPc MDEs                                                  | 1.0 M KHCO <sub>3</sub>              | flow cell | 1                                      | -0.7                 | 100               | 300                                          | 99.5   | 11        |
| ClAg <sub>14</sub> (C≡CtBu) <sub>12</sub> <sup>+</sup> NCs | 1 M KOH                              | MEA       | 0.28                                   | 2.63 <sup>a</sup>    | 0                 | 400                                          | 99     | 12        |
| Sb1Cu                                                      | 0.5M KHCO <sub>3</sub>               | flow cell | 1                                      | -1.16                | 85                | 452                                          | 90.4   | 13        |
| ligand-derived Ag                                          | 1 M KOH                              | flow cell | 0.3                                    | 3.4 <sup>a</sup>     | 0                 | 298.4                                        | >90    | 14        |
| CuCo-DSAC                                                  | 1 M KOH                              | flow cell | 1                                      | -0.66                | 0                 | 500                                          | 98.5   | 15        |
| Ag-GB                                                      | 0.5 M K <sub>2</sub> SO <sub>4</sub> | flow cell | 0.76                                   | -1.58                | 80                | 500                                          | 98.8   | this work |
| Ag-GB                                                      | 0.5 M K <sub>2</sub> SO <sub>4</sub> | flow cell | 0.76                                   | -1.96                | 80                | 1282                                         | 92.4   | this work |
| Ag-GB                                                      | 1 M KOH                              | flow cell | 0.76                                   | -0.8                 | 80                | 198                                          | 98.7   | this work |
| Ag-GB                                                      | 1 M KOH                              | flow cell | 0.76                                   | -1.63                | 80                | 1269.2                                       | 90.6   | this work |

Notes: <sup>a</sup>the potential value is related to the full cell volume; <sup>b</sup>the relevant data is not provided in the literature.

## Supplementary References

- 1 J. Chen, X. Liu, S. Xi, T. Zhang, Z. Liu, J. Chen, L. Shen, S. Kawi and L. Wang, *ACS Nano*, 2022, **16**, 13982.
- 2 S. Yoo, D. Kim, G. Deng, Y. Chen, K. Lee, S. Yoo, X. Liu, Q. Tang, Y. J. Hwang, T. Hyeon and M. S. Bootharaju, *J. Am. Chem. Soc.*, 2025, **147**, 12546.
- 3 Z. Chen, X. Zhang, W. Liu, M. Jiao, K. Mou, X. Zhang and L. Liu, *Energy Environ. Sci.*, 2021, **14**, 2349.
- 4 T. Wang, J. Wang, C. Lu, K. Jiang, S. Yang, Z. Ren, J. Zhang, X. Liu, L. Chen, X. Zhuang and J. Fu, *Adv. Mater.*, 2023, **35**, 2205553.
- 5 Y.-H. Yu, X. Cui, Y.-M. Hong, G.-W. Qin and S. Li, *Appl. Catal., B: Environ.*, 2025, **373**, 125352.
- 6 S. Brückner, Q. Feng, W. Ju, D. Galliani, A. Testolin, M. Klingenhof, S. Ott and P. Strasser, *Nat. Chem. Eng.*, 2024, **1**, 229.
- 7 K. Ye, G. Zhang, X.-Y. Ma, C. Deng, X. Huang, C. Yuan, G. Meng, W.-B. Cai and K. Jiang, *Energy Environ. Sci.*, 2022, **15**, 749.
- 8 Y. Li, N. M. Adli, W. Shan, M. Wang, M. J. Zachman, S. Hwang, H. Tabassum, S. Karakalos, Z. Feng, G. Wang, Y. C. Li and G. Wu, *Energy Environ. Sci.*, 2022, **15**, 2108.
- 9 X. Wang, X. Sang, C.-L. Dong, S. Yao, L. Shuai, J. Lu, B. Yang, Z. Li, L. Lei, M. Qiu, L. Dai and Y. Hou, *Angew. Chem., Int. Ed.*, 2021, **60**, 11959.
- 10 W. Ni, Y. Gao, Y. Lin, C. Ma, X. Guo, S. Wang and S. Zhang, *ACS Catal.*, 2021, **11**, 5212.
- 11 X. Zhang, Y. Wang, M. Gu, M. Wang, Z. Zhang, W. Pan, Z. Jiang, H. Zheng, M. Lucero, H. Wang, G. E. Sterbinsky, Q. Ma, Y.-G. Wang, Z. Feng, J. Li, H. Dai and Y.

Liang, *Nat. Energy*, 2020, **5**, 684.

12 H. Seong, K. Chang, F. Sun, S. Lee, S. M. Han, Y. Kim, C. H. Choi, Q. Tang and D. Lee, *Adv. Sci.*, 2024, **11**, 2306089.

13 J. Li, H. Zeng, X. Dong, Y. Ding, S. Hu, R. Zhang, Y. Dai, P. Cui, Z. Xiao, D. Zhao, L. Zhou, T. Zheng, J. Xiao, J. Zeng and C. Xia, *Nat. Commun.*, 2023, **14**, 340.

14 Y.-J. Ko, C. Lim, J. Jin, M. G. Kim, J. Y. Lee, T.-Y. Seong, K.-Y. Lee, B. K. Min, J.-Y. Choi, T. Noh, G. W. Hwang, W. H. Lee and H.-S. Oh, *Nat. Commun.*, 2024, **15**, 3356.

15 M. Liu, Y. Yang, W. Zhang, G. Wu, Q. Huang, J. Wen and D. Wang, *Angew. Chem., Int. Ed.*, 2025, **64**, e202504423.
